# Supplementary material for: AKAP79 enables calcineurin to directly suppress protein kinase A activity
Source: eLife. 2021 Oct 6;10:e68164. doi: 10.7554/eLife.68164 (PMC8560092; doi:10.7554/eLife.68164)
Supplement: Figure 1—figure supplement 2—source data 1. [file elife-68164-fig1-figsupp2-data1.xlsx]

## Sheet: Figure 1- Supplement 2
	Panel A
		Rep 1	Rep 2	Rep 3	Mean	S.E.	Mean	S.E.
	pRII𝛂 concentration(nM)	(% phosphate released)	(% phosphate released)	(% phosphate released)	(% phosphate released)	(% phosphate released)	(s-1)	(s-1)
	20000	0.0290365	0.0305181	0.0376302	0.0333334	0.00429687	0.111111	0.0143229
	10000	0.0234705	0.0351952	0.0381146	0.0322601	0.00447488	0.0537669	0.00745813
	5000	0.0350144	0.0334442	0.0308401	0.0330996	0.00121728	0.027583	0.0010144
	2000	0.0350974	0.0364754	0.0141247	0.0285659	0.00723151	0.00952195	0.0024105
	1000	n/d	0.00874318	0.0279389	0.0183411	0.00959787	0.00305684	0.00159965
	500	0.0326452	0.0377369	n/d	0.0351911	0.00254584	0.00293259	0.000212154
	200	0.0402558	0.0448129	0.0248304	0.0425343	0.00740502	0.00141781	0.000246834
	Panel B
		Rep 1	Rep 2	Rep 3	Mean	S.E.	Mean	S.E.
	pRII𝛃 concentration(nM)	(% phosphate released)	(% phosphate released)	(% phosphate released)	(% phosphate released)	(% phosphate released)	(s-1)	(s-1)
	20000	0.0332261	0.0300498	0.028281	0.0307536	0.00247252	0.102512	0.00824172
	10000	0.0326415	0.0290046	0.0292985	0.0303149	0.0011664	0.0505248	0.001944
	5000	0.03193	0.0323425	0.0313017	0.0318581	0.000302579	0.0265484	0.000252149
	2000	0.0346285	0.0289297	0.0280933	0.0305505	0.00205326	0.0101835	0.00068442
	1000	0.0331118	0.0350299	0.0231793	0.0281456	0.00496628	0.00469093	0.000827713
	500	0.0354877	0.029075	0.0296453	0.0314027	0.00204914	0.00261689	0.000170762
	200	0.037782	0.0344737	0.0274362	0.0361278	0.00165412	0.00120426	5.51373e-05
