# Supplementary material for: AKAP79 enables calcineurin to directly suppress protein kinase A activity
Source: eLife. 2021 Oct 6;10:e68164. doi: 10.7554/eLife.68164 (PMC8560092; doi:10.7554/eLife.68164)
Supplement: Figure 1—figure supplement 3—source data 1. [file elife-68164-fig1-figsupp3-data1.xlsx]

## Sheet: Figure 1 - Supplement 3
	Panel A
		Normalised rates
	Condition	Rep 1	Rep 2	Rep 3	Rep 4	Mean	S.E.
	CN + CaM	0.885	1.03	1.026	1.06	1	0.039
	CN no CaM	0.196	0.193	0.19	0.185	0.191	0.002
	AKAP79c97 WT 2 uM	1.572	1.637	1.571	1.657	1.609	0.022
	AKAP79c97 WT 10 uM	1.657	1.693	1.652	1.766	1.692	0.026
	AKAP79c97 deltaCN 2 uM	0.9	1.016	1.006	1.075	0.999	0.036
	AKAP79c97 deltaCN 10 uM	1.163	1.187	1.124	1.167	1.16	0.013
	AKAP79c97 deltaPKA 2 uM	1.339	1.394	1.336	1.398	1.367	0.017
	AKAP79c97 deltaPKA 10 uM	1.407	1.469	1.407	1.488	1.443	0.021
	Panel B
		Normalised rates
	Condition	Rep 1	Rep 2	Rep 3	Rep 4	Rep 5	Rep 6	Mean	S.E.
	CN + CaM	1.269	1.295	0.665	0.889	0.855	1.027	1	0.101
	CN no CaM	0.043	0.078	0.043	0.104	0.035	0.069	0.062	0.011
	AKAP79c97 WT 2 uM	0.432	0.708	0.302	0.596	0.492	0.535	0.511	0.057
	AKAP79c97 WT 10 uM	0.432	0.656	0.328	0.449	0.397	0.544	0.468	0.047
	AKAP79c97 deltaCN 2 uM	1.01	1.278	0.656	0.863	0.872	0.863	0.924	0.085
	AKAP79c97 deltaCN 10 uM	0.95	1.148	0.483	0.794	0.803	0.665	0.807	0.093
	AKAP79c97 deltaPKA 2 uM	0.794	1.01	0.483	0.656	0.656	0.622	0.704	0.073
	AKAP79c97 deltaPKA 10 uM	0.734	0.889	0.466	0.647	0.622	0.596	0.659	0.058
