# Supplementary material for: AKAP79 enables calcineurin to directly suppress protein kinase A activity
Source: eLife. 2021 Oct 6;10:e68164. doi: 10.7554/eLife.68164 (PMC8560092; doi:10.7554/eLife.68164)
Supplement: Figure 1—source data 1. [file elife-68164-fig1-data1.xlsx]

## Sheet: Figure 1
	Panel 1C
		Rep 1	Rep 2	Rep 3	Rep 4	Mean	S.E.
	Condition	(fraction of phosphate released)	(fraction of phosphate released)	(fraction of phosphate released)	(fraction of phosphate released)	(fraction of phosphate released)	(fraction of phosphate released)
	pRII𝛂 alone	0.00313955	0.00244482	0.00740072	0.00156431	0.00363735	0.0012952
	pRII𝛂 + AKAP79 WT	0.0490705	0.0496168	0.043564	0.0385418	0.0451982	0.00260604
	pRII𝛂 + AKAP79 deltaCN	0.00130435	0.00338039	0.00303575	n/d	0.0025735	0.00055627
	Panel 1D
		Rep 1	Rep 2	Rep 3	Rep 4	Mean	S.E.
	Condition	(fraction of phosphate released)	(fraction of phosphate released)	(fraction of phosphate released)	(fraction of phosphate released)	(fraction of phosphate released)	(fraction of phosphate released)
	RII𝛃 alone	0.00226494	0.000914797	0.00696485	0.00337251	0.00337927	0.00129653
	RII𝛃 + AKAP79 WT	0.0500493	0.0556603	0.05709	0.0569109	0.0549276	0.0016569
	RII𝛃 + AKAP79 deltaCN	0.00241549	0.00169223	0.00195811	0.00209724	0.00204077	0.00015053
	Panel 1E
		Rep 1	Rep 2	Rep 3	Average	S.E.	Mean	S.E.
	pRII𝛂- AKAP79c97 concentration (nM)	(fraction of phosphate released)	(fraction of phosphate released)	(fraction of phosphate released)	(fraction of phosphate released)	(fraction of phosphate released)	(s-1)	(s-1)
	5000	0.0197397	0.0213307	0.0217876	0.0209527	0.000620676	0.349211	0.0103446
	3500	0.0286865	0.0296447	0.0251606	0.0278306	0.00136338	0.32469	0.0159061
	2000	0.0458233	0.0397273	0.0389647	0.0415051	0.0021703	0.276701	0.0144687
	1000	0.0612323	0.0655625	0.0574642	0.0614196	0.00233966	0.204732	0.00779886
	500	0.0624602	0.0765104	0.0516122	0.0635276	0.00720729	0.105879	0.0120122
	200	0.0856333	0.0850469	0.0584495	0.0763766	0.00896511	0.0509177	0.00597674
	100	0.0908528	0.0638674	0.0836764	0.0794655	0.00806951	0.0264885	0.00268984
	Panel 1F
		Rep 1	Rep 2	Rep 3	Average	S.E.	Mean	S.E.
	pRII𝛃- AKAP79c97 concentration (nM)	(fraction of phosphate released)	(fraction of phosphate released)	(fraction of phosphate released)	(fraction of phosphate released)	(fraction of phosphate released)	(s-1)	(s-1)
	5000	0.0109492	0.0133363	n/d	0.0121428	0.00119353	0.20238	0.0198922
	2000	0.0289849	0.0237692	0.0242393	0.0256645	0.00212926	0.171096	0.0141951
	1000	0.0490218	0.0517817	0.0347828	0.0451954	0.00112673	0.150651	0.00375578
	500	0.055106	0.0497098	0.0515864	0.0521341	0.00220301	0.0868901	0.00367169
	200	0.0602231	0.0516864	0.0895313	0.0671469	0.00348507	0.0447646	0.00232338
	100	0.0615234	0.0581629	0.120637	0.0801078	0.00137189	0.0267026	0.000457295
