# Supplementary material for: AKAP79 enables calcineurin to directly suppress protein kinase A activity
Source: eLife. 2021 Oct 6;10:e68164. doi: 10.7554/eLife.68164 (PMC8560092; doi:10.7554/eLife.68164)
Supplement: Figure 2—source data 1. [file elife-68164-fig2-data1.xlsx]

## Sheet: Figure 2
	Panel 2D
		Rep 1	Rep 2	Rep 3	Rep 4	Rep 5	Average	S.E.	Mean	S.E.
	PKA subunit	ng/mg total protein	ng/mg total protein	ng/mg total protein	ng/mg total protein	ng/mg total protein	ng/mg total protein	ng/mg total protein	Copy number relative to C	Copy number relative to C
	C (pan)	336.944	444	326.706	266.78	248.488	324.584	34.3143	1	0.11
	RII𝛂	2269.88	3166.91	3083.44	3401.78	4096.31	3203.66	293.584	9.35	0.86
	RII𝛃	769.282	680.743	621.083	496.621	455.477	604.641	57.9166	1.64	0.16
	RI (pan)	71.8873	94.3867	689.67	492.324	692.077	408.069	137.563	1.19	0.4
