# Supplementary material for: AKAP79 enables calcineurin to directly suppress protein kinase A activity
Source: eLife. 2021 Oct 6;10:e68164. doi: 10.7554/eLife.68164 (PMC8560092; doi:10.7554/eLife.68164)
Supplement: Figure 3—figure supplement 1—source data 1. [file elife-68164-fig3-figsupp1-data1.xlsx]

## Sheet: Figure 3 - Supplement 1
	Panels 3B & D
	Mean (% Y/C ratio change per minute)				Standard Error (% Y/C ratio change per minute)
	C subunit concentration (nM)	No CN	With CN		C subunit concentration (nM)	No CN	With CN
	400	27.9167	27.7778		400	1.94279	1.08772
	200	12.9167	14.3056		200	0.265952	1.54452
	100	6.11111	7.22222		100	1.3796	0.680414
	50	2.36111	2.36111		50	0.917788	1.3679
	25	1.52778	1.38889		25	0.138889	0.160375
	0	-0.00295037	0.0985603		0	0.0311805	0.0641324
