# Supplementary material for: AKAP79 enables calcineurin to directly suppress protein kinase A activity
Source: eLife. 2021 Oct 6;10:e68164. doi: 10.7554/eLife.68164 (PMC8560092; doi:10.7554/eLife.68164)
Supplement: Figure 3—figure supplement 2—source data 1. [file elife-68164-fig3-figsupp2-data1.xlsx]

## Sheet: Figure 3 - Supplement 2
	Panel B
		Normalised rate
	Condition	Rep 1	Rep 2	Rep 3	Rep 4	Rep 5	Rep 6	Mean	S.E.
	PKA alone	1.0255	1.0738	0.916	0.7776	1.0931	1.114		0.053
	PKA + CN 1.5 uM	1.2927	1.0609	1.0368	0.813	1.114	0.7856	1.0172	0.0781
	PKA + PP1 1.5 uM	-0.0048	0.2672	0.2061	0.0419	0.1851	0.1256	0.1368	0.0422
	Panel D
	Condition	Mean dephosphorylation rate	S.E.
	No phos (n=10)	0.00308	0.00124
	0.3 uM CN (n=7)	0.00746	0.00147
	1 uM CN (n=7)	0.01094	0.00132
	3 uM CN (n=7)	0.03365	0.00193
	0.1 uM PP1 (n=9)	0.15364	0.01636
	0.3 uM PP1 (n=7)	0.4363	0.00725
	1 uM PP1 (n=6)	1	0.08924
