# Supplementary material for: AKAP79 enables calcineurin to directly suppress protein kinase A activity
Source: eLife. 2021 Oct 6;10:e68164. doi: 10.7554/eLife.68164 (PMC8560092; doi:10.7554/eLife.68164)
Supplement: Figure 3—source data 1. [file elife-68164-fig3-data1.xlsx]

## Sheet: Figure 3
	Panel 3D
	Mean Y/C emission ratio changes (% per minute)								Standard Errors (% per minute)
	cAMP concentration (nM)	0	100	200	500	1000	2000		cAMP concentration (nM)	0	100	200	500	1000	2000
	PKA (II)	0.45687	1.66667	4.58333	12.9167	18.8889	28.7037		PKA (II)	0.329061	1.11111	2.40429	3.89797	0.555556	0.489954
	PKA (II) + CN	0.340037	0.780167	3.75	11.3889	14.0741	27.037		PKA (II) + CN	0.145112	0.443456	1.3679	3.49529	0.979908	1.87942
	PKA (II) + CN + AKAP79c97	0.00423976	0.188019	1.63428	4.27554	6.66667	13.5185		PKA (II) + CN + AKAP79c97	0.034673	0.0995272	0.480419	1.44962	0.848625	1.33539
	Panel 3F
	Y/C emission ratio changes (% per minute)
		Mean	S.E.
	Additive	(% per min)	(% per min)
	No AKAP	16.6667	0.486819
	AKAP79c97 WT	8.09028	0.670837
	AKAP79c97 deltaCN	15.4167	0.583774
	AKAP79c97 deltaPKA	15.9375	0.76025
