# Supplementary material for: AKAP79 enables calcineurin to directly suppress protein kinase A activity
Source: eLife. 2021 Oct 6;10:e68164. doi: 10.7554/eLife.68164 (PMC8560092; doi:10.7554/eLife.68164)
Supplement: Figure 4—source data 1. [file elife-68164-fig4-data1.xlsx]

## Sheet: Figure 4
	Panels 4A-C
	Free C subunits (as a fraction of total C subunits)
	Mean values								Standard errors
		cAMP Concentration (nM)								cAMP Concentration (nM)
	Condition	0	100	200	500	1000	2000		Condition	0	100	200	500	1000	2000
	PKA (II)	0.0178506	0.0541038	0.1293	0.319539	0.478687	0.656516		PKA (II)	0.0128569	0.0360692	0.0959224	0.136372	0.01482	0.0112063
	PKA (II) + CN	0.0138647	0.0282226	0.108715	0.285927	0.392013	0.621274		PKA (II) + CN	0.00591678	0.0160421	0.0560823	0.1241	0.0116653	0.0431866
	PKA (II) + CN + AKAP79c97	0.000326642	0.00835265	0.0532	0.121756	0.202127	0.332688		PKA (II) + CN + AKAP79c97	0.0026713	0.00442145	0.0221167	0.0583807	0.00855644	0.0328637
	Standard errors
