# Supplementary material for: AKAP79 enables calcineurin to directly suppress protein kinase A activity
Source: eLife. 2021 Oct 6;10:e68164. doi: 10.7554/eLife.68164 (PMC8560092; doi:10.7554/eLife.68164)
Supplement: Figure 5—source data 1. [file elife-68164-fig5-data1.xlsx]

## Sheet: Figure 5
	Panel 5E
	Initial Rates (Y/C emission ratio change per minute)
	Condition	Mean	S.E.
	RII𝛂 WT alone	0.350309	0.0127443
	RII𝛂 WT + AKAP79c97/CN	0.137346	0.0131852
	RII𝛂 S98A alone	0.111111	0.00925926
	RII𝛂 S98A + AKAP79c97/CN	0.104938	0.00743308
	RII𝛂 S98E alone	0.521605	0.0600386
	RII𝛂 S98E + AKAP79c97/CN	0.427469	0.0572986
	% Change with addition of AKAP79c97/CN
	RII𝛂 variant	Rep 1	Rep 2	Rep 3	Rep 4	Rep 5	Rep 6	Mean	S.E.
	RII𝛂 WT	-73.1707	-65	-45.9459	-48.5714	-63.6364	-65.8537	-60.363	4.37148
	RII𝛂 S98A	18.1818	16.6667	12.5	-28.5714	-33.3333	0	-2.42605	9.41051
	RII𝛂 S98E	-13.0435	-31.9149	-30.2632	-8.33333	-4.91803	-22.2222	-18.4492	4.65394
