# Supplementary material for: AKAP79 enables calcineurin to directly suppress protein kinase A activity
Source: eLife. 2021 Oct 6;10:e68164. doi: 10.7554/eLife.68164 (PMC8560092; doi:10.7554/eLife.68164)
Supplement: Figure 6—source data 1. [file elife-68164-fig6-data1.xlsx]

## Sheet: Figure 6
	Panel 6D
		Mean	S.E.
	RII𝛂 variant	spines per 10 𝛍m	spines per 10 𝛍m
	RII𝛂 WT	1.75658	0.126964
	RII𝛂 98A	1.16922	0.109209
	RII𝛂 98E	1.85967	0.107249
	Panel 6F
		RII𝛂 WT	RII𝛂 WT	RII𝛂 S97A	RII𝛂 S97A	RII𝛂 S97E	RII𝛂S97E
	Time (minutes)	Mean spine density	S.E.	Mean spine density	S.E.	Mean spine density	S.E.
	-15	0.981213	0.0146789	0.979766	0.00615218	0.976142	0.0124088
	-10	0.99352	0.0030316	1.00094	0.00870513	0.984099	0.00966663
	-5	0.99352	0.0030316	1.00312	0.00796788	1.00329	0.0108629
	0	1	0	1	0	1	0
	5	1.01057	0.0172332	1.00658	0.00629134	1.009	0.0052376
	10	1.00321	0.0156197	1.00929	0.00616354	0.986274	0.0054495
	15	0.977316	0.0261835	1.00214	0.0115227	0.966842	0.00803036
	20	0.950649	0.0267851	0.982252	0.0120228	0.955602	0.0112212
	25	0.925002	0.0344718	0.968142	0.00935488	0.937215	0.0108366
	30	0.887797	0.0259572	0.956684	0.00844302	0.930876	0.0127525
	35	0.857562	0.020266	0.949297	0.00837841	0.918587	0.0127545
	40	0.846766	0.021632	0.948373	0.00557378	0.910395	0.0171293
	45	0.82493	0.018234	0.925345	0.00649624	0.904298	0.0162416
	50	0.835103	0.0285061	0.919113	0.0057336	0.902656	0.0228147
	55	0.810083	0.00917938	0.913364	0.00672511	0.901008	0.018012
	60	0.796358	0.0163823	0.90931	0.00956504	0.901008	0.018012
	Panel 6G
	Spine density changes
		RII𝛂 WT	RII𝛂 S97A	RII𝛂 S97E
		(% change)	(% change)	(% change)
	Rep 1	-20	-8.25688	-11.7647
	Rep 2	-17.5824	-8.47458	-13.1579
	Rep 3	-23.494	-12.1622	-9.7561
	Rep 4	-24.6154	-10	-4.91803
	Rep 5	-16.129	-6.45161	n/d
	Mean	-20.3642	-9.06905	-9.89918
	S.E.	1.63823	0.956504	1.8012
